# Supplementary material for: Combination Blockade of the IL6R/STAT-3 Axis with TIGIT and Its Impact on the Functional Activity of NK Cells against Prostate Cancer Cells
Source: PubMed Central journal article supplement (PMC9020142; doi:10.1155/2022/1810804), 2022-04-12

**a**

**RWPE-1**

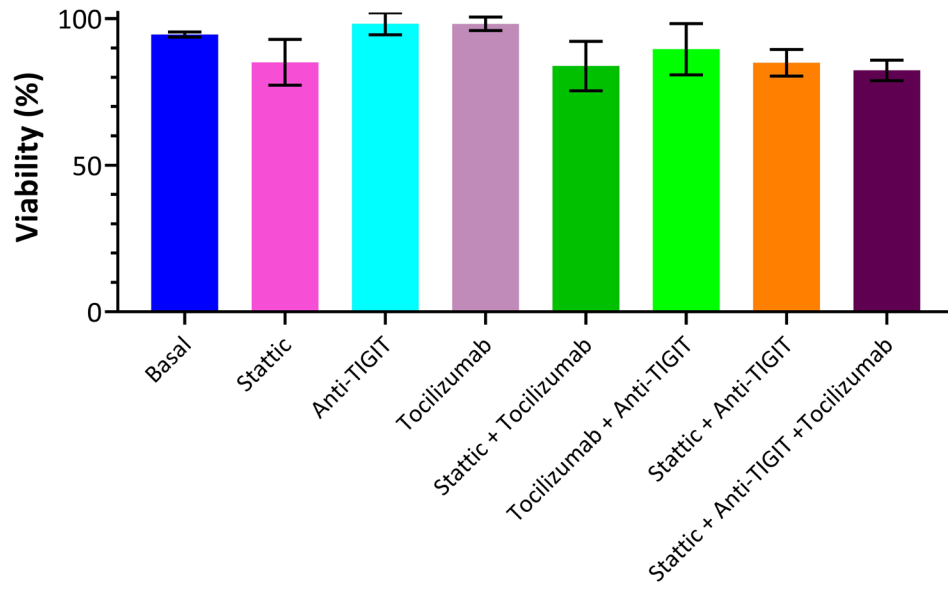

**b**

**RWPE-1**

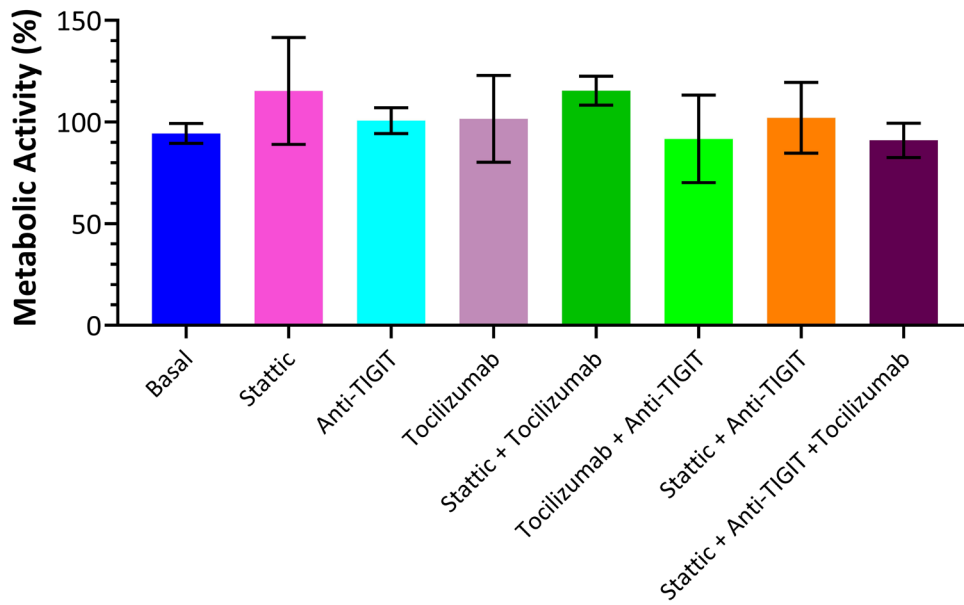

Supplement: 1810804.f1.pdf [file 1810804.f1.pdf]
